# Supplementary material
Source: PubMed Central journal article supplement (PMC7441170)
Supplement: bloodBLD2020005222-suppl1.pdf [file bloodBLD2020005222-suppl1.pdf]

## SUPPLEMENTAL INFORMATION

### The Ectodomain of Matriptase-2 Plays an Important Non-Proteolytic Role in Suppressing Hepsidin Expression in Mice

Caroline A. Enns, Shall Jue, and An-Sheng Zhang

#### Supplemental Materials and Methods

**cDNA constructs.** We purchased mouse Mt2 (NM\_027902.1), Alk2 (NM\_007394.1), Alk3 (NM\_009758.3), ActRIIA (NM\_007396.1), Bmpr2 (NM\_007561.3), Hfe (NM\_010424.1), and the hepatocyte growth factor activator inhibitor-2 (Hai-2; NM\_011464.2) ORFs with a C-terminal FLAG/MYC epitope in pCMV6 vector (pCMV6-Mt2, Alk2, Alk3, ActRIIA, Bmpr2, Hfe, and Hai-2) from Origene (Table 1). pcDNA3-Tfr2 construct was generated by subcloning mouse Tfr2 ORF into pcDNA3. Mouse Hvj ORF with a N-terminal 3xFLAG epitope in pCMV9 vector (pCMV9-Hvj) was generated in our previous study.<sup>1</sup> Mouse  $\beta$ 2-microglobulin (B2M) and pEGFP-N1-expressing constructs were the same as previously described.<sup>2,3</sup> We generated pCMV6-Mt2<sup>I286F</sup>, pCMV6-Mt2<sup>S762A</sup>, and pCMV6-Mt2<sup>mask</sup> constructs by site-directed mutagenesis in this and previous studies.<sup>2</sup> All the sequences were verified by DNA sequencing.

The Mt2, Mt2<sup>I286F</sup>, Mt2<sup>S762A</sup>, Mt2<sup>mask</sup>, and Hai-2 constructs were subcloned into an AAV8 construct containing a strong liver-specific promoter (LSP) as described in our previous study.<sup>4</sup> The LSP is a combination of two copies of a human  $\alpha$ 1-microglobulin/bikunin enhancer and the promoter from the human thyroid hormone-binding globulin gene. AAV8-Mt2, Mt2<sup>I286F</sup>, Mt2<sup>S762A</sup>, Mt2<sup>mask</sup>, and Hai-2 vectors were generated at the Molecular Virology Support Core, OHSU.

**Animal studies.** All animal procedures were approved by OHSU DCM. We purchased heterozygous *Tmprss6*<sup>+/-</sup> mutant mice on B6/129 background.<sup>2</sup> Both wild-type and homozygous *Tmprss6*<sup>-/-</sup> mice were generated by breeding *Tmprss6*<sup>+/-</sup> mice on mixed background. All *Tmprss6*<sup>-/-</sup> mice used in the studies were within two generations of breeding and had similar degree of iron deficiency and anemia with no obvious gender-related difference.<sup>2</sup> Wild-type 129S6 mice were bred and maintained in the DCM of OHSU. All animals were fed a PicoLab Laboratory Rodent Diet 5L0D containing 240 ppm iron (LabDiet).

Eight-week old *Tmprss6*<sup>-/-</sup> mice were intraperitoneally injected with AAV8-Mt2, AAV8-Mt2<sup>S762A</sup>, or AAV8-Mt2<sup>I286F</sup> viral vectors at the doses indicated in the figure legends. The AAV8 vector alone had no effects on iron homeostasis in mice.<sup>1,5</sup> Injection of PBS was included as a control. Mice were euthanized for analysis three weeks after injection. Blood was collected by cardiac puncture for serum iron assay using a serum iron/TIBC Reagent Set (Teco Diagnostics, Anaheim, CA) and hematology analysis using Hemavet 950 (Drew Scientific). Livers were snap-frozen for qRT-PCR and western blot. Age, gender, and background-matched wild-type littermates were included as additional controls. Injection of AAV8-Mt2<sup>mask</sup> into *Tmprss6*<sup>-/-</sup> mice was performed in our previous studies.<sup>3</sup>

Eight-week old wild-type 129S6 mice were intraperitoneally injected with AAV8-Hai-2 viral vectors at the doses indicated in the figure legends. Injection of PBS was included as a control. Animals were euthanized for analysis three weeks after injection.

**qRT-PCR.** qRT-PCR analysis of *Tmprss6*, hepcidin, Inhibitor of DNA binding-1 (*Id1*), *Hai-2*, and  $\beta$ -actin transcripts in the liver were conducted as previously described.<sup>2,4</sup> All primers (Supplemental Table S1) were verified for linearity of amplification. The results are expressed as the amount relative to that of  $\beta$ -actin for each sample.

**Immunodetection of hepatic Mt2, HJV, and Hai-2.** Protein extracts from whole liver tissues, liver membrane fractions, as well as the concentrated FLAG-tagged Hai-2 by using anti-FLAG affinity gel, were separated by using SDS-PAGE under reducing conditions. The liver tissues from *Tmprss6*<sup>-/-</sup> mice that express exogenous Mt2<sup>mask</sup>, wild-type or *Hjv*<sup>-/-</sup> mice on 129S6 background, and wild-type or *Hjv*<sup>-/-</sup> mice that express exogenous FLAG-Hjv were from our previous studies.<sup>1,2</sup> Liver membrane fractions were prepared as previously described.<sup>6</sup> FLAG-tagged Hai-2 from ~2 mg liver extract proteins was pulled down by using anti-FLAG affinity gel (Sigma #A2220), followed by elution with 3xFLAG peptide at ~200 µg/ml (Sigma F4799). The transduced exogenous Mt2, Hai-2, and Hjv in the liver were probed directly by using an HRP-coupled mouse anti-FLAG M2 IgG (Sigma) and chemiluminescence. The endogenous Hjv and β-actin were detected by using purified mouse anti-Hjv, mouse anti-β-actin (Sigma), and the corresponding secondary antibodies. The intensities of specific bands were quantified by using the ImageJ software.

**Serum HGF assay.** Serum HGF concentrations were detected by using a Mouse HGF ELISA kit (#RAB0214; Sigma-Aldrich).

**Cell lines and transfection.** Hep3B, HEK293, and CHO cells were obtained from ATCC. We used transient co-transfection with Lipofectamine-2000 (Invitrogen) to determine the cleavage of Alk2, Alk3, ActRIIA, Bmpr2, Hjv, Hfe, and Tfr2 by wild-type, mutated, or truncated Mt2. To detect the cleaved Hjv and Tfr2 fragments in conditioned medium (CM), medium was changed to Opti-MEM/1% FCS with or without aprotinin (G Biosciences) or furin convertase inhibitor (FCI; Alexis, San Diego, CA) at ~30 hr post-transfection. CM was collected after ~24 hr of incubation for immunodetection as previously described.<sup>3</sup>

**Biotinylation of cell surface proteins.** Cell surface proteins of transfected cells were biotinylated on ice and analyzed as described in our previous studies.<sup>2,3</sup>

**Immunoprecipitation.** HEK293 cells were transfected with individual plasmid. Cell lysates were collected and mixed in the presence of protease inhibitors. The cell lysates were pre-cleared, and co-immunoprecipitation was performed by using protein-A agarose beads (Invitrogen) coated with either rabbit anti-MT2 antibody<sup>7</sup> or rabbit anti-HJV 18745 antibody<sup>8</sup>.

## References

1. Zhao N, Maxson JE, Zhang RH, Wahedi M, Enns CA, Zhang AS. Neogenin Facilitates the Induction of Hepcidin Expression by Hemojuvelin in the Liver. *J Biol Chem*. 2016;291(23):12322-12335.
2. Wahedi M, Wortham AM, Kleven MD, et al. Matriptase-2 suppresses hepcidin expression by cleaving multiple components of the hepcidin induction pathway. *J Biol Chem*. 2017;292(44):18354-18371.
3. Mao P, Wortham AM, Enns CA, Zhang AS. The catalytic, stem, and transmembrane portions of matriptase-2 are required for suppressing the expression of the iron-regulatory hormone hepcidin. *J Biol Chem*. 2019;294(6):2060-2073.
4. Zhang AS, Gao J, Koeberl DD, Enns CA. The role of hepatocyte hemojuvelin in the regulation of bone morphogenic protein-6 and hepcidin expression in vivo. *J Biol Chem*. 2010;285(22):16416-16423.
5. Gao J, Chen J, De Domenico I, et al. Hepatocyte-targeted HFE and Tfr2 control hepcidin expression in mice. *Blood*. 2010;115(16):3374-3381.
6. Frydlova J, Fujikura Y, Vokurka M, Necas E, Krijt J. Decreased hemojuvelin protein levels in mask mice lacking matriptase-2-dependent proteolytic activity. *Physiol Res*. 2013;62(4):405-411.

7. Enns CA, Ahmed R, Zhang AS. Neogenin Interacts with Matriptase-2 to Facilitate Hemojuvelin Cleavage. *J Biol Chem.* 2012;287(42):35104-35117.
8. Zhang AS, West AP, Jr., Wyman AE, Bjorkman PJ, Enns CA. Interaction of hemojuvelin with neogenin results in iron accumulation in human embryonic kidney 293 cells. *J Biol Chem.* 2005;280(40):33885-33894.

**Supplemental Table S1. List of mouse-specific primers used for qRT-PCR analysis**

| Gene           | Forward primer                 | Reverse primer                |
|----------------|--------------------------------|-------------------------------|
| $\beta$ -actin | 5'-CTGCCTGACGGCCAGGT-3'        | 5'-TGGATGCCACAGGATTCCAT-3'    |
| Hai-2          | 5'-TATGGAGGCTGTGAAGGCAAT-3'    | 5'-AGAGTCGGCTCCATTCCTGTT-3'   |
| Hepcidin       | 5'-CACCAACTTCCCCATCTGCATCTT-3' | 5'-GAGGGGCTGCAGGGGTGTAGAG-3'  |
| Id1            | 5'-ACCCTGAACGGCGAGATCA-3'      | 5'-TCGTCTGGCTGGAACACATG-3'    |
| Tmprss6 (1)    | 5'-TTGCTGGTCTTGGCTGCGCT-3'     | 5'-AATGACGGTTGAGCACCCGGAG-3'  |
| Tmprss6 (2)    | 5'-GCCAGTGGATGATCCAGAACA-3'    | 5'-TGAAGTTGATGGTGACACCATCT-3' |

### A. Alk2

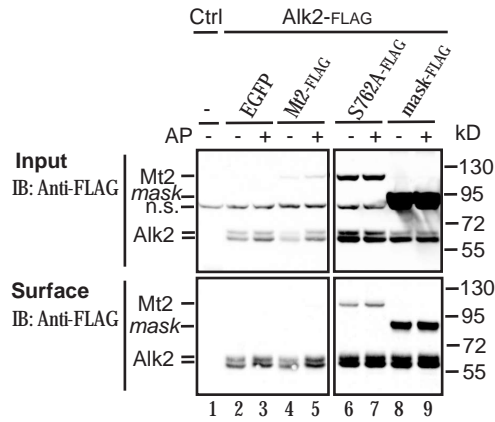

### B. Bmpr2

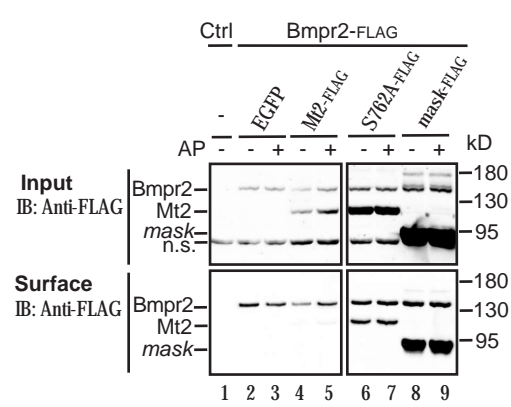

**Figure S1.** Cleavage of *Alk2* (A) and *Bmpr2* (B) by *Mt2*, the protease-dead *Mt2*<sup>S762A</sup>, and *Mt2*<sup>mask</sup> in *Hep3B* cells. The co-transfection, biotinylation, and immunodetection were performed essentially the same as described in the legend to **Figure 2A**. Each panel was cropped from the same image. *Alk2*, *Bmpr2*, *Mt2*, *Mt2*<sup>S762A</sup>, and *Mt2*<sup>mask</sup> were immunodetected by using an anti-FLAG antibody. IB: immunoblotting. All experiments were repeated three times with consistent results.

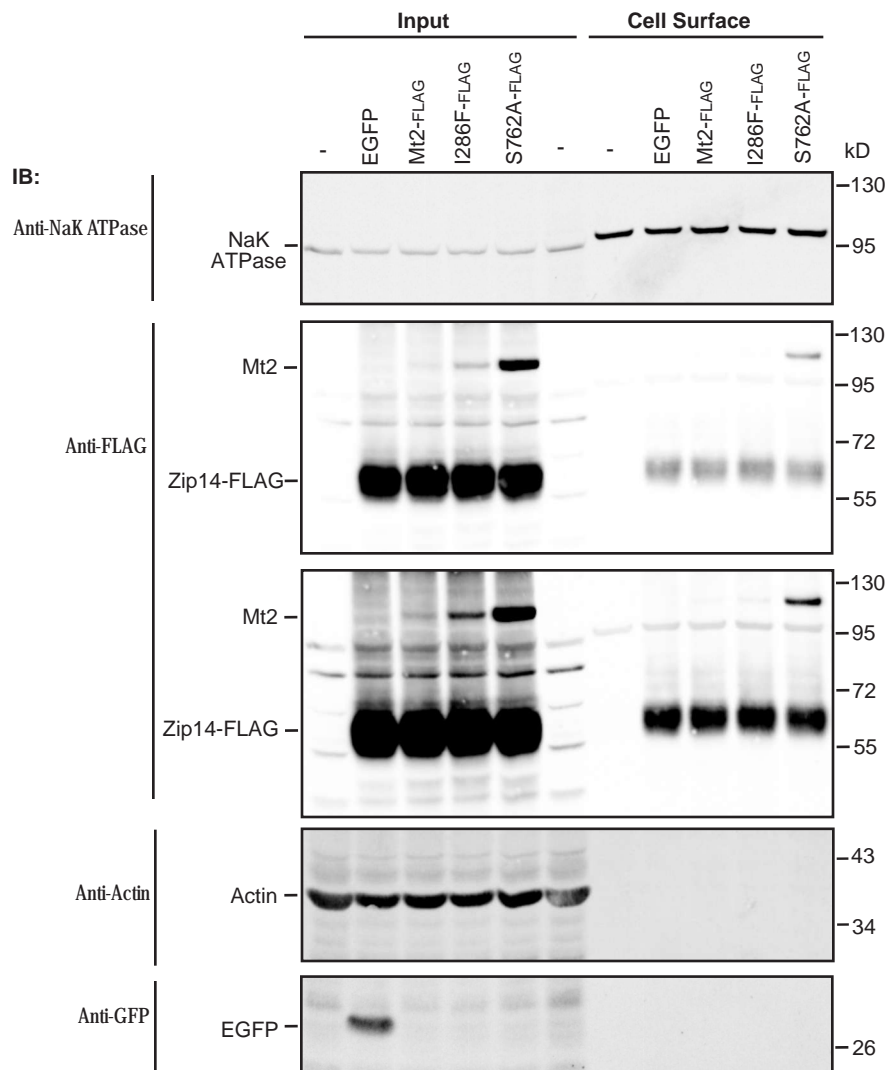

**Figure S2.** *Mt2 does not cleave Zip14 and display no evident effect on cell surface Zip14 in Hep3B cells.* The co-transfection, biotinylation, and immunodetection were performed essentially the same as described in the legend to **Figure 2A**. Zip14, Mt2, Mt2<sup>I286F</sup>, and Mt2<sup>S762A</sup> were immunodetected by using an anti-FLAG antibody. Experiments were repeated three times with consistent results.

### A. CHO cells - Hjv

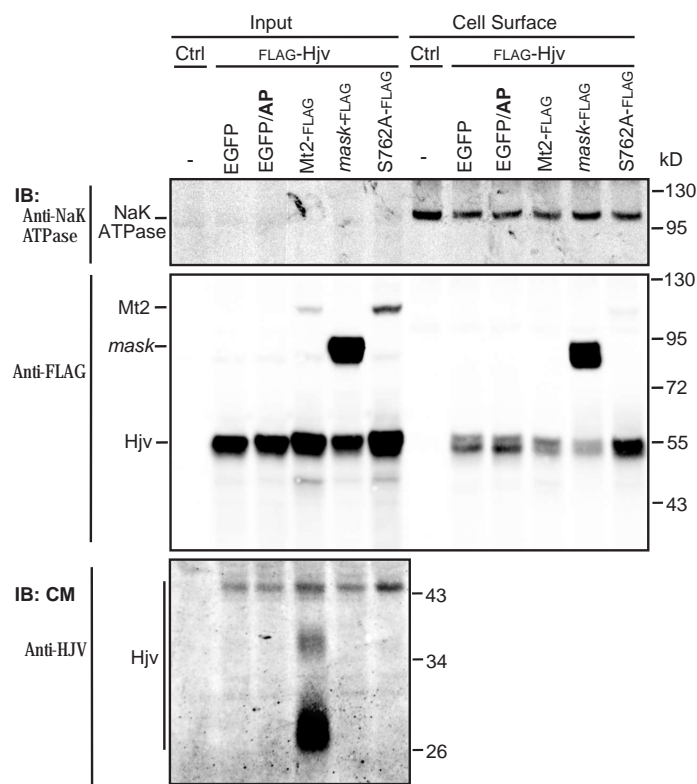

### B. CHO cells - Hfe

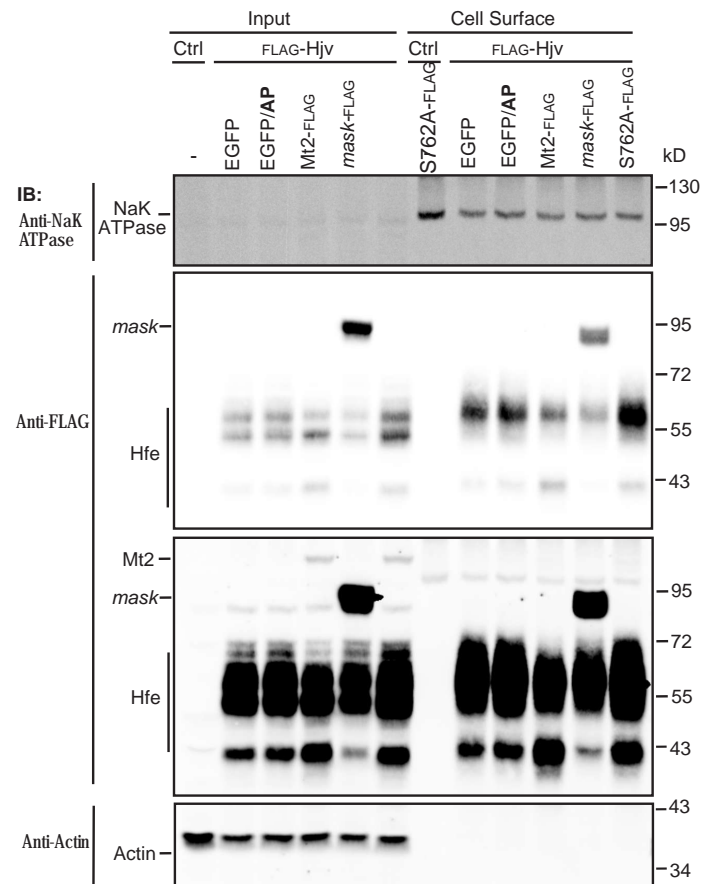

### C. HEK293 cells - Hjv

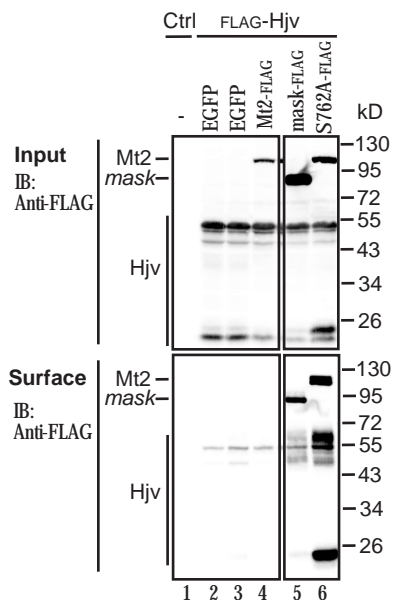

### D. HEK293 cells - Hfe

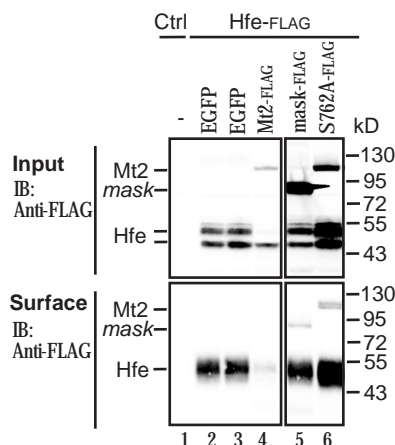

**Figure S3.** Effects of Mt2, Mt2<sup>S762A</sup> and Mt2<sup>mask</sup> on Hjv and Hfe in CHO cells (A/B) and HEK293 cells (C/D). Transfection of Hjv and Hfe, biotinylation, and immunodetection were performed as described in the legends to **Figure 2A/E**. Two images for Mt2 and Hfe with different exposure were presented in **B**. Cellular and cell surface Mt2, Mt2<sup>S762A</sup>, Mt2<sup>mask</sup>, Hjv, and Hfe were immunodetected by using an anti-FLAG antibody. Hjv in the CM was immunodetected by using an anti-HJV antibody. All experiments were repeated at least three times with consistent results.

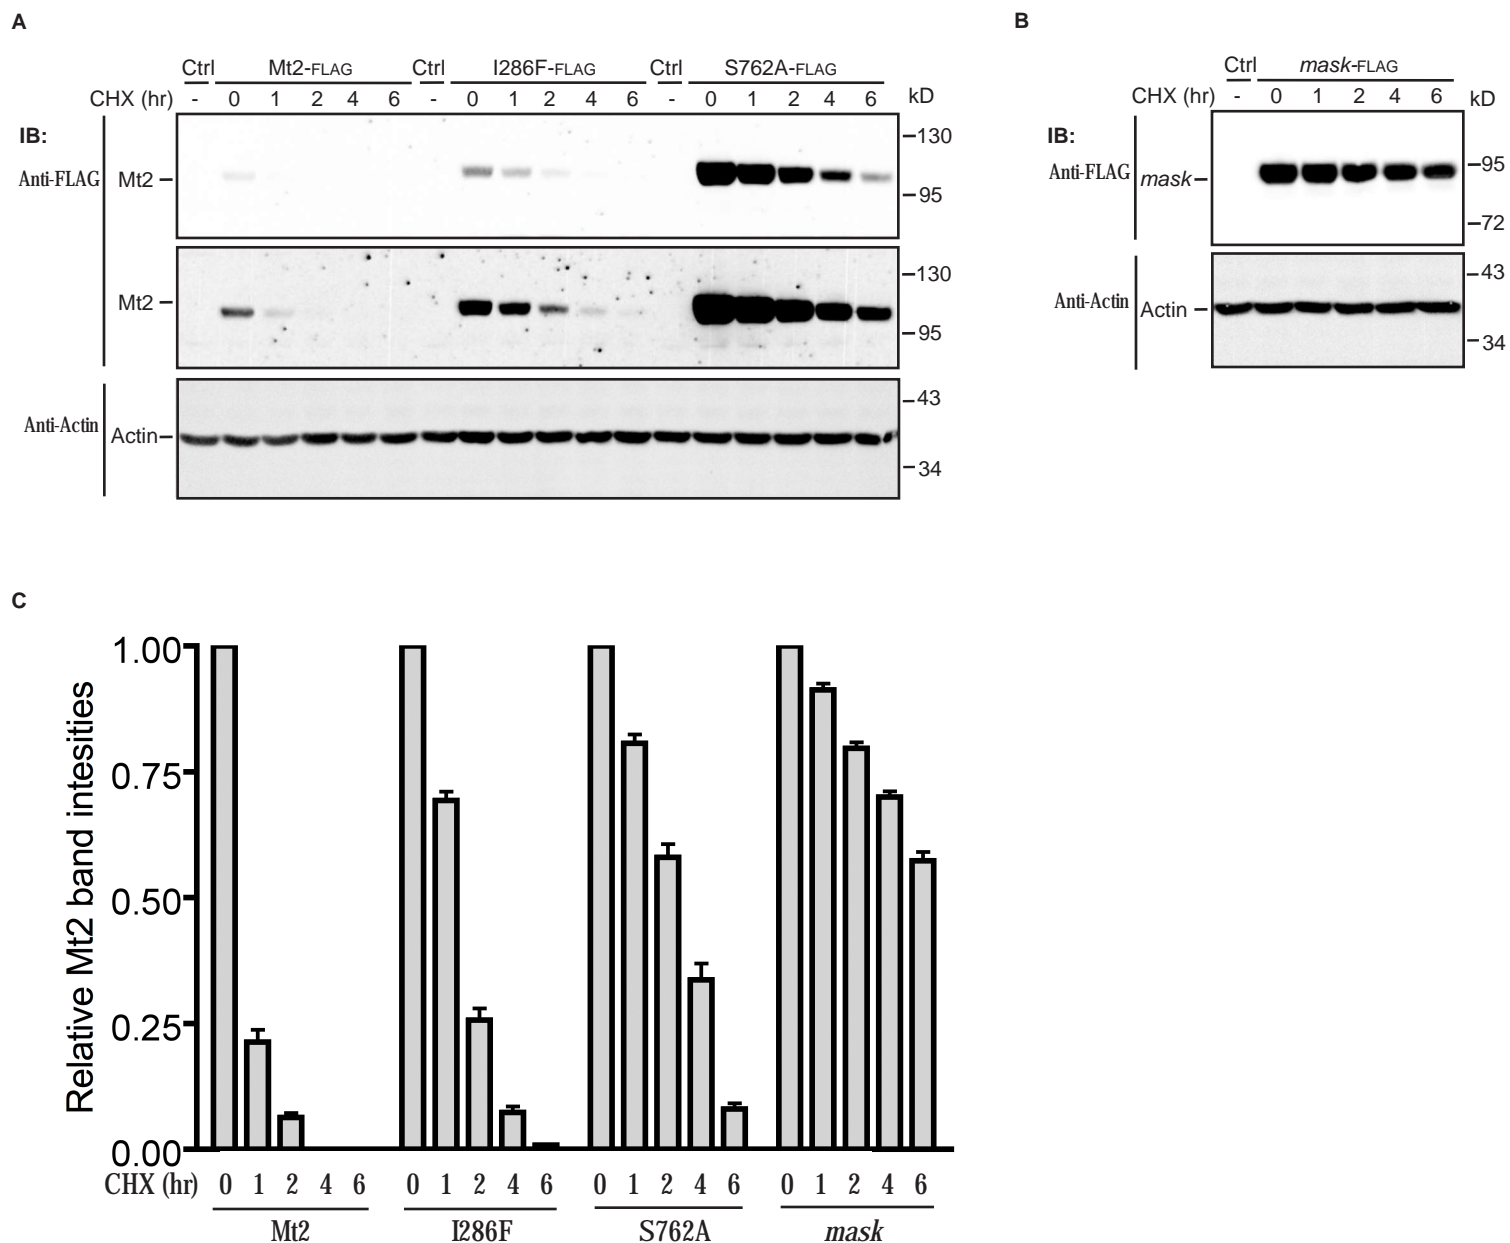

**Figure S4.** Analysis of the degradation rates of cellular Mt2, Mt2<sup>I286F</sup>, Mt2<sup>S762A</sup>, and Mt2<sup>mask</sup> in Hep3B cells. Hep3B cells in 12-well plates were transfected with an equal amount of pCMV9-Mt2, Mt2<sup>I286F</sup>, Mt2<sup>S762A</sup>, or Mt2<sup>mask</sup> plasmid DNA. At about 2 day post-transfection, fresh medium with 100  $\mu$ g/mL of cycloheximide (CHX) was changed to block protein biosynthesis. After 0, 1, 2, 4, and 6 hr of incubation, cell lysate was collected for immunodetection of Mt2 and mutants using an anti-FLAG antibody (A/B). All experiments were repeated three times with consistent results. C) Quantification of Mt2 and mutant bands in A & B.

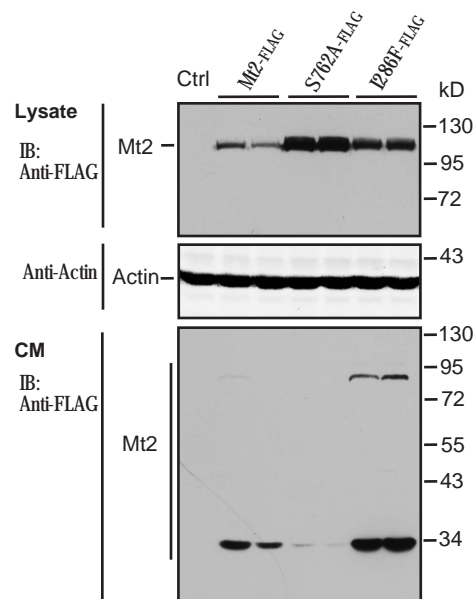

**Figure S5.** *I286F* mutation in *Mt2* does not affect the catalytic domain shedding. HEK293 cells were transfected with equal amount of pCMV9-Mt2, Mt2<sup>S762A</sup>, or Mt2<sup>I286F</sup> plasmid DNA. At about 30 hr post-transfection, medium was changed to Opti-MEM/1% FCS. Analysis was performed after another 18 hr of incubation. About 150  $\mu$ g of cell lysate proteins and TCA-precipitated proteins from the conditioned medium (CM) were subjected to SDS-PAGE and immunodetection by using anti-FLAG HRP and anti- $\beta$  actin. Experiments were repeated at least three times with consistent results.

### A. Alk3/BMP6

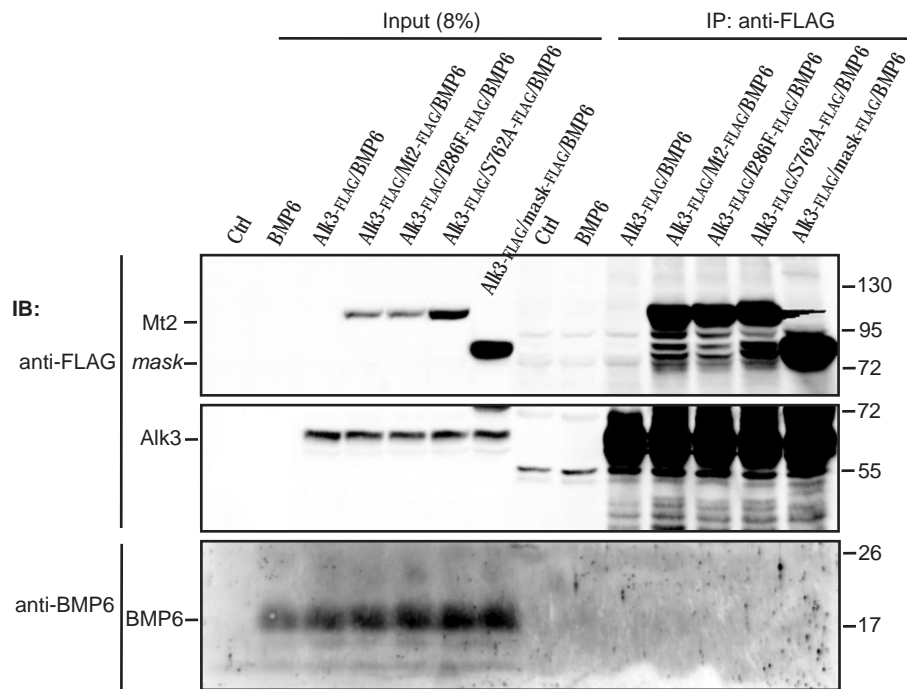

### B. Hvj/BMP6

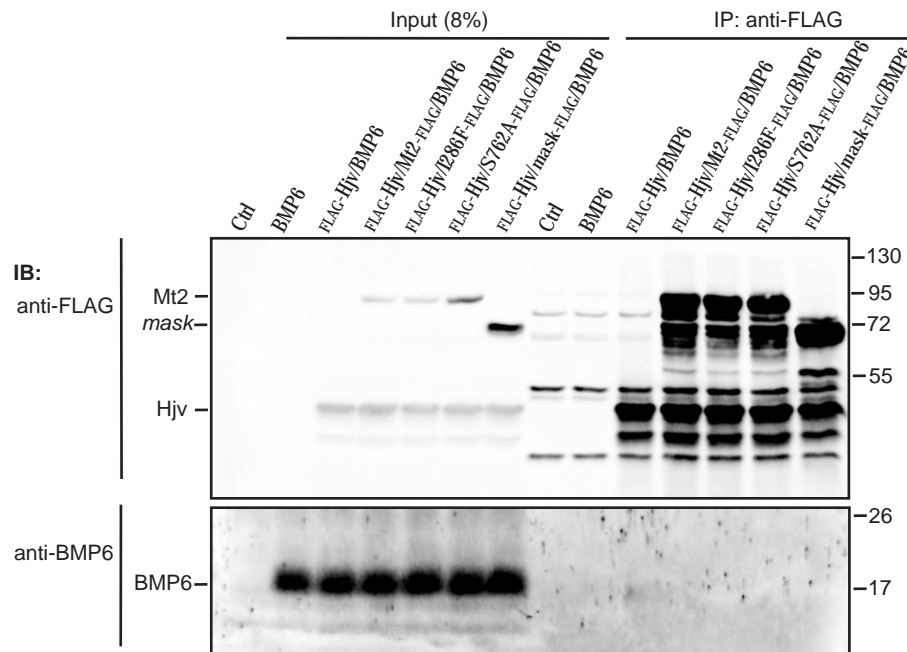

**Figure S6.** Co-immunoprecipitation analysis of Alk3 (A) and Hvj (B) with BMP6 in the absence or presence of Mt2 or mutants. HEK293 cells were transfected individually with pCMV6-Mt2, Mt2<sup>I286F</sup>, Mt2<sup>S762A</sup>, Mt2<sup>mask</sup>, Alk3, or pCMV9-Hvj. Un-transfected cells were used as control (Ctrl). Alk3 or Hvj lysates (~400  $\mu$ l) were mixed sequentially with BMP6 (300 ng; R&D #507-BP) and control or Mt2 or mutant lysates (~400  $\mu$ l). After overnight incubation at 4°C, Alk3, Hvj, and Mt2 was pulled down by using anti-FLAG affinity gel (Sigma #A2220), and eluted by using 3xFLAG Peptide at ~200  $\mu$ g/ml (Sigma F4799). About 8% of input and the entire eluates were subjected to SDS-PAGE, followed by immunodetection of Alk3/Hvj/Mt2 and BMP6 using mouse anti-FLAG and goat anti-BMP6 antibody (sc-7406; Santa Cruz Biotechnology), respectively. The experiments were repeated three times with consistent results.

### A. Mt2

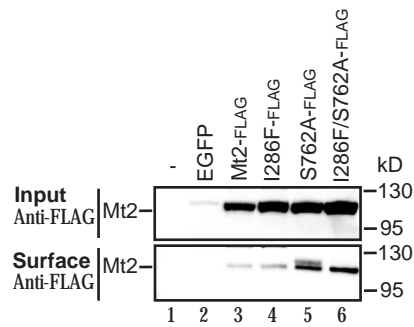

### B. Hvj/Mt2

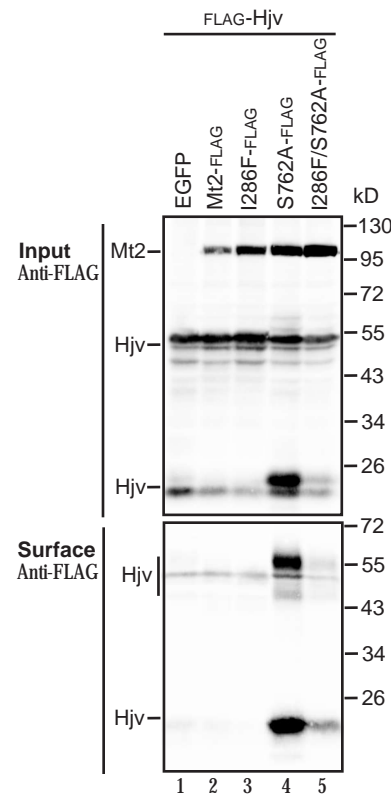

**Figure S7.** Cell surface expression of  $Mt2^{I286F/S762A}$  and the effects of  $Mt2^{I286F/S762A}$  on cell surface Hvj in HEK293 cells. **A)** Cell surface expression of  $Mt2^{I286F/S762A}$ . HEK293 cells were transfected with equal amount of pEGFP-N1 (EGFP), pCMV9-Mt2,  $Mt2^{I286F}$ ,  $Mt2^{S762A}$ , or  $Mt2^{I286F/S762A}$  plasmid DNA. At about 2 days post-transfection, cell surface proteins were biotinylated at 4°C, followed by pull-down of the biotinylated proteins using streptavidin agarose beads. The eluted cell surface proteins and ~10% of input lysate was subjected to SDS-PAGE and immunodetection by using anti-FLAG antibody. **B)** Effects of  $Mt2^{I286F/S762A}$  on cell surface Hvj. pCMV9-Hvj was co-transfected with an equal amount of pEGFP-N1 (EGFP), pCMV9-Mt2,  $Mt2^{I286F}$ ,  $Mt2^{S762A}$ , or  $Mt2^{I286F/S762A}$  plasmid DNA into HEK293 cells. At about 2 days post-transfection, cell surface proteins were biotinylated at 4°C, followed by pull-down of the biotinylated proteins using streptavidin agarose beads. The eluted cell surface proteins and ~10% of input lysate was subjected to SDS-PAGE and immunodetection by using anti-FLAG antibody for Mt2,  $Mt2^{I286F}$ ,  $Mt2^{S762A}$ ,  $Mt2^{mask}$ , and Hvj. All experiments were repeated at least three times with consistent results.

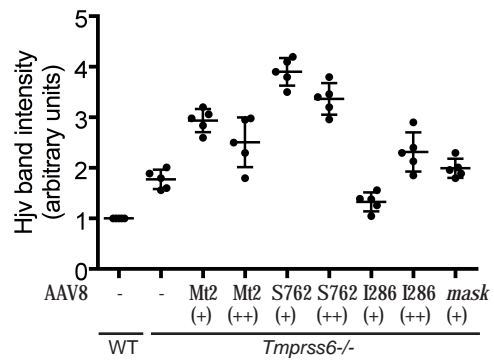

**Figure S8.** Quantification of *Hiv* bands from **Figure 6A/B**.

A. Hvj

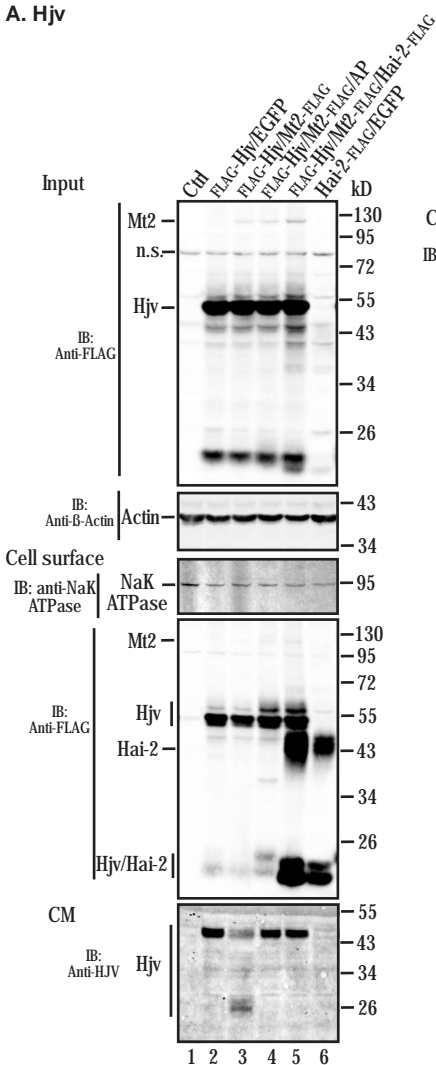

B. Alk3

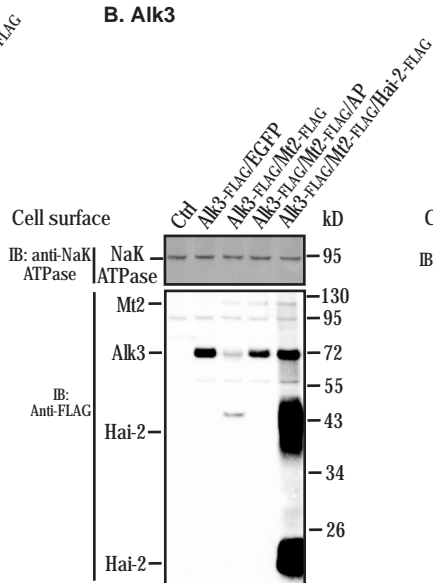

C. ActRIIA

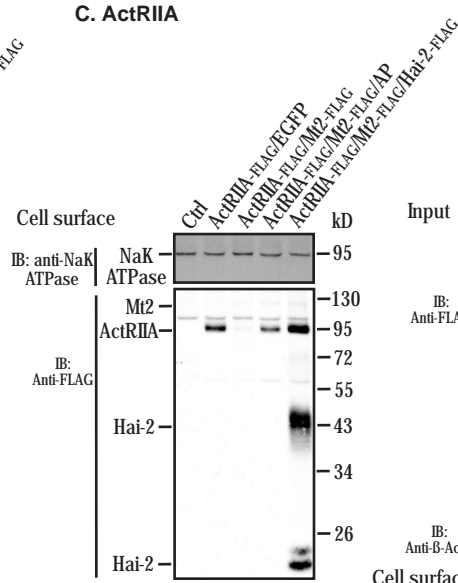

D. Hfe

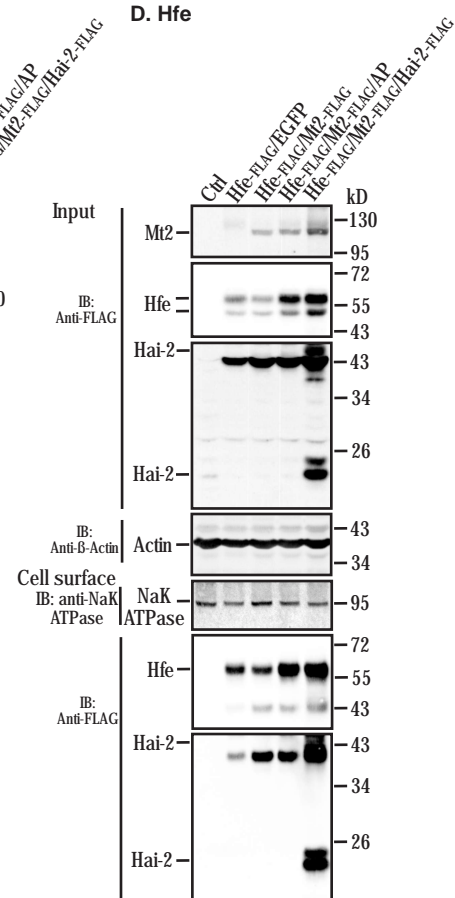

**Figure S9.** *Hai-2* inhibits *Mt2* cleavage of *Hvj*, *Alk3*, *ActRIIA*, and *Hfe* in Hep3B cells. **A-C)** *Hai-2* inhibition of *Mt2* cleavage of *Hvj* (**A**), *Alk3* (**B**), and *ActRIIA* (**C**). pCMV9-*Hvj*, pCMV6-*Alk3*, or pCMV6-*ActRIIA* was co-transfected with pCMV6-*Mt2* and pCMV6-*Hai-2* or pEGFP-N1 at 1:1:1 ratios of plasmid DNA into Hep3B cells. At about 2 days post-transfection, cell surface proteins were biotinylated, followed by pull-down of biotinylated proteins and immunodetection as described in the legends to **Figure 2A-C**. **D)** *Hai-2* inhibition of *Mt2* cleavage of *Hfe*. Hep3B cells were co-transfected with pCMV6-*Hfe*, pJB-1-B2M, pCMV6-*Mt2*, and *Hai-2* or pEGFP-N1 at 1:1:1:1 ratios of plasmid DNA. Biotinylation were the same as described above for *Hvj*, *Alk3*, and *Hfe*. Cellular and cell surface *Mt2*, *Hfe*, and *Hai-2* were immunodetected by using an anti-FLAG antibody. All experiments were repeated at least three times with consistent results.
